# Supplementary material for: Effects of Nitrogen Application on Nitrogen Fixation in Common Bean Production
Source: Front Plant Sci. 2020 Aug 6;11:1172. doi: 10.3389/fpls.2020.01172 (PMC7424037; doi:10.3389/fpls.2020.01172)
Supplement: Supplementary file 8 [file Table_7.xlsx]

## Sheet: Sheet1
Supplementary Table S7 | Correlation matrix for nine traits evaluated in 22 common bean genotypes at the ERS in 2017 and 2018 using Lsmeans.
Pearson Correlation Coefficients, N = 22
Prob > |r| under H0: Rho=0
Traits	Ndfa	YD	Cdisc	DM	HR	DF	PH	SW	SPAD	Ndfa_C	YD_C	Cdisc_C	DM_C	HR_C	DF_C	PH_C	SW_C	SPAD_C	Ndfa_R	YD_R	Cdisc_R	DM_R	HR_R	DF_R	PH_R	SW_R	SPAD_R	Ndfa_N	YD_N	Cdisc_N	DM_N	HR_N	DF_N	PH_N	SW_N	SPAD_N	Ndfa_RN	YD_RN	Cdisc_RN	DM_RN	HR_RN	DF_RN	PH_RN	SW_RN	SPAD_RN
Ndfa	1	0.39806	0.03963	0.07388	0.3457	0.1564	0.10401	0.62381	0.6725	0.9786	0.55841	0.07925	0.07288	0.47232	0.12694	0.23735	0.65159	0.69063	0.97781	0.51247	-0.29855	0.05289	0.44835	0.23075	0.06546	0.6919	0.76224	0.91897	0.16265	0.11063	0.1382	0.19406	0.13427	-0.10843	0.54806	0.54795	0.95836	0.22661	0.20622	0.04596	0.21178	0.07175	0.16728	0.52737	0.3931
		0.0665	0.861	0.7438	0.1151	0.487	0.6451	0.0019	0.0006	<.0001	0.0069	0.7259	0.7472	0.0264	0.5735	0.2875	0.001	0.0004	<.0001	0.0147	0.1771	0.8152	0.0364	0.3015	0.7722	0.0004	<.0001	<.0001	0.4696	0.624	0.5396	0.3868	0.5513	0.631	0.0083	0.0083	<.0001	0.3105	0.3572	0.8391	0.3441	0.751	0.4568	0.0117	0.0703
YD	0.39806	1	0.04595	0.57301	-0.62511	0.26049	0.53987	0.34528	0.37761	0.44281	0.94091	-0.00174	0.51842	-0.51	0.26311	0.50234	0.38541	0.43852	0.35315	0.92428	-0.01181	0.5605	-0.42997	0.26753	0.36206	0.39477	0.42588	0.32916	0.89065	-0.06721	0.57892	-0.73323	0.25777	0.43164	0.2741	0.20318	0.38271	0.92501	0.22088	0.56867	-0.59177	0.21479	0.6599	0.28108	0.25495
	0.0665		0.8391	0.0053	0.0019	0.2417	0.0095	0.1155	0.0832	0.039	<.0001	0.9939	0.0134	0.0153	0.2368	0.0172	0.0765	0.0412	0.1069	<.0001	0.9584	0.0067	0.0458	0.2287	0.0978	0.069	0.0481	0.1347	<.0001	0.7663	0.0048	0.0001	0.2468	0.0449	0.217	0.3645	0.0788	<.0001	0.3233	0.0058	0.0037	0.3371	0.0008	0.2051	0.2522
Cdisc	0.03963	0.04595	1	0.0813	0.00254	-0.07823	0.09404	0.25382	0.04208	0.01011	-0.0559	0.90929	0.07136	0.0507	-0.07813	0.12369	0.25524	0.03833	-0.01484	0.05304	0.85831	0.0528	-0.00607	-0.03964	0.12197	0.27896	0.02282	0.18344	0.00079	0.88819	0.02955	0.02057	-0.12046	0.06316	0.20599	0.10863	0.03427	0.15596	0.93542	0.15107	-0.0432	-0.10783	0.00959	0.24851	0.00482
	0.861	0.8391		0.7191	0.991	0.7293	0.6772	0.2544	0.8525	0.9644	0.8048	<.0001	0.7523	0.8227	0.7296	0.5834	0.2516	0.8655	0.9478	0.8146	<.0001	0.8155	0.9786	0.861	0.5887	0.2087	0.9197	0.4138	0.9972	<.0001	0.8961	0.9276	0.5934	0.7801	0.3577	0.6304	0.8796	0.4882	<.0001	0.5022	0.8486	0.6329	0.9662	0.2648	0.983
DM	0.07388	0.57301	0.0813	1	-0.34582	0.51263	0.70648	-0.07426	0.03758	0.01059	0.43263	-0.03525	0.96721	-0.3473	0.48767	0.67839	-0.0242	-0.01317	0.01162	0.66428	0.06442	0.96564	-0.38739	0.48622	0.54465	-0.029	0.07201	0.14464	0.37246	0.0052	0.96446	-0.29021	0.494	0.64892	-0.16984	0.05174	0.18731	0.6091	0.23264	0.9775	-0.26421	0.54448	0.6869	-0.08236	0.02683
	0.7438	0.0053	0.7191		0.1149	0.0147	0.0002	0.7426	0.8681	0.9627	0.0443	0.8762	<.0001	0.1133	0.0213	0.0005	0.9149	0.9536	0.9591	0.0007	0.7758	<.0001	0.0749	0.0218	0.0088	0.898	0.7501	0.5207	0.0878	0.9817	<.0001	0.1901	0.0195	0.0011	0.4499	0.8191	0.4039	0.0026	0.2975	<.0001	0.2348	0.0088	0.0004	0.7156	0.9057
HR	0.3457	-0.62511	0.00254	-0.34582	1	-0.03831	-0.34011	0.18417	0.0477	0.26579	-0.48295	0.02841	-0.27628	0.93091	-0.08324	-0.21746	0.19918	0.00179	0.34951	-0.38477	-0.16737	-0.34128	0.87111	-0.00643	-0.1075	0.16484	0.05279	0.38812	-0.71011	0.15687	-0.32402	0.96078	-0.04305	-0.47669	0.17181	0.16326	0.36634	-0.73448	-0.01731	-0.38426	0.91315	-0.02409	-0.43291	0.18271	-0.02488
	0.1151	0.0019	0.991	0.1149		0.8656	0.1214	0.4119	0.8331	0.2319	0.0228	0.9001	0.2133	<.0001	0.7127	0.331	0.3742	0.9937	0.1108	0.077	0.4566	0.1201	<.0001	0.9774	0.6339	0.4635	0.8155	0.0743	0.0002	0.4857	0.1413	<.0001	0.8491	0.0249	0.4445	0.4679	0.0936	<.0001	0.9391	0.0775	<.0001	0.9153	0.0442	0.4157	0.9125
DF	0.1564	0.26049	-0.07823	0.51263	-0.03831	1	0.76466	0.18838	-0.03682	0.11255	0.26933	-0.13901	0.53243	-0.12433	0.96526	0.73957	0.15959	0.03196	0.0959	0.47983	-0.03889	0.50235	-0.03791	0.97198	0.75035	0.17515	0.00063	0.18134	0.03387	-0.16429	0.46797	-0.00882	0.97534	0.63323	0.18166	-0.02714	0.26283	0.14924	0.05909	0.49109	0.00581	0.97748	0.65839	0.22751	-0.19122
	0.487	0.2417	0.7293	0.0147	0.8656		<.0001	0.4012	0.8708	0.618	0.2255	0.5372	0.0107	0.5814	<.0001	<.0001	0.4781	0.8877	0.6712	0.0238	0.8636	0.0172	0.867	<.0001	<.0001	0.4356	0.9978	0.4193	0.8811	0.465	0.0281	0.9689	<.0001	0.0016	0.4185	0.9046	0.2373	0.5074	0.7939	0.0203	0.9795	<.0001	0.0009	0.3086	0.394
PH	0.10401	0.53987	0.09404	0.70648	-0.34011	0.76466	1	0.06282	-0.01557	0.08854	0.48528	-0.01857	0.72789	-0.42918	0.71213	0.9332	0.09837	0.05642	0.06635	0.60892	0.08153	0.68485	-0.34089	0.80305	0.87038	0.06141	-0.00103	0.11381	0.37318	-0.00756	0.66417	-0.29534	0.69092	0.89906	0.03006	0.01349	0.15549	0.50223	0.26561	0.66631	-0.22127	0.75427	0.92441	0.05019	-0.16019
	0.6451	0.0095	0.6772	0.0002	0.1214	<.0001		0.7812	0.9452	0.6952	0.0221	0.9346	0.0001	0.0462	0.0002	<.0001	0.6632	0.8031	0.7693	0.0026	0.7183	0.0004	0.1205	<.0001	<.0001	0.786	0.9964	0.614	0.0872	0.9734	0.0007	0.1821	0.0004	<.0001	0.8944	0.9525	0.4896	0.0172	0.2322	0.0007	0.3224	<.0001	<.0001	0.8245	0.4764
SW	0.62381	0.34528	0.25382	-0.07426	0.18417	0.18838	0.06282	1	0.17198	0.62328	0.41114	0.21133	-0.10556	0.20426	0.20867	0.04573	0.98033	0.30742	0.57018	0.39907	0.0363	-0.05732	0.44259	0.21082	0.15035	0.97789	0.3145	0.6581	0.29777	0.30662	-0.04709	0.01586	0.181	-0.0585	0.98132	0.00669	0.56383	0.1684	0.33363	-0.0674	0.06372	0.10272	0.0972	0.97701	-0.15884
	0.0019	0.1155	0.2544	0.7426	0.4119	0.4012	0.7812		0.4441	0.0019	0.0573	0.3451	0.6401	0.3619	0.3514	0.8399	<.0001	0.164	0.0056	0.0658	0.8726	0.8	0.0391	0.3463	0.5042	<.0001	0.154	0.0009	0.1783	0.1652	0.8351	0.9441	0.4202	0.7959	<.0001	0.9764	0.0063	0.4538	0.1292	0.7657	0.7782	0.6492	0.667	<.0001	0.4802
SPAD	0.6725	0.37761	0.04208	0.03758	0.0477	-0.03682	-0.01557	0.17198	1	0.71681	0.53453	0.16817	0.03618	0.27356	-0.08803	0.11611	0.17065	0.94065	0.65828	0.38834	-0.13019	0.03105	0.11374	0.03132	-0.03392	0.29312	0.96472	0.54466	0.14276	-0.01003	0.06201	-0.0856	-0.04013	-0.21272	0.11287	0.91568	0.61554	0.32226	0.11056	0.02524	-0.06139	-0.08318	0.06256	0.06885	0.89576
	0.0006	0.0832	0.8525	0.8681	0.8331	0.8708	0.9452	0.4441		0.0002	0.0104	0.4544	0.873	0.218	0.6969	0.6069	0.4477	<.0001	0.0009	0.0741	0.5636	0.8909	0.6143	0.89	0.8809	0.1855	<.0001	0.0088	0.5262	0.9647	0.784	0.7049	0.8593	0.3419	0.617	<.0001	0.0023	0.1436	0.6243	0.9112	0.7861	0.7129	0.7821	0.7608	<.0001
Ndfa_C	0.9786	0.44281	0.01011	0.01059	0.26579	0.11255	0.08854	0.62328	0.71681	1	0.60728	0.07579	0.01004	0.40286	0.06901	0.21914	0.64151	0.74859	0.95375	0.52163	-0.3056	-0.01478	0.40439	0.1939	0.03378	0.69803	0.80276	0.8654	0.22747	0.07066	0.0933	0.09339	0.09377	-0.12492	0.55686	0.56857	0.90628	0.27295	0.15583	-0.02548	0.13663	0.03322	0.17754	0.51999	0.43286
	<.0001	0.039	0.9644	0.9627	0.2319	0.618	0.6952	0.0019	0.0002		0.0027	0.7375	0.9646	0.063	0.7603	0.3272	0.0013	<.0001	<.0001	0.0128	0.1666	0.948	0.0619	0.3873	0.8814	0.0003	<.0001	<.0001	0.3086	0.7547	0.6796	0.6793	0.6781	0.5797	0.0071	0.0058	<.0001	0.2191	0.4886	0.9104	0.5443	0.8833	0.4293	0.0131	0.0442
YD_C	0.55841	0.94091	-0.0559	0.43263	-0.48295	0.26933	0.48528	0.41114	0.53453	0.60728	1	-0.07753	0.3688	-0.36477	0.26587	0.47409	0.44412	0.61809	0.52097	0.86112	-0.15948	0.43207	-0.30108	0.31155	0.33261	0.45766	0.5809	0.44345	0.7939	-0.13423	0.46207	-0.60935	0.23905	0.32422	0.34467	0.33707	0.53723	0.8165	0.14061	0.42653	-0.46369	0.21493	0.62971	0.34721	0.35406
	0.0069	<.0001	0.8048	0.0443	0.0228	0.2255	0.0221	0.0573	0.0104	0.0027		0.7316	0.0912	0.0951	0.2317	0.0258	0.0384	0.0022	0.0129	<.0001	0.4784	0.0446	0.1733	0.1581	0.1304	0.0322	0.0046	0.0387	<.0001	0.5515	0.0304	0.0026	0.284	0.141	0.1162	0.125	0.0099	<.0001	0.5325	0.0478	0.0297	0.3368	0.0017	0.1134	0.106
Cdisc_C	0.07925	-0.00174	0.90929	-0.03525	0.02841	-0.13901	-0.01857	0.21133	0.16817	0.07579	-0.07753	1	-0.01512	0.1206	-0.17812	0.00447	0.19238	0.08627	0.03678	-0.01009	0.68395	-0.03453	0.02898	-0.1051	0.02754	0.25732	0.18355	0.17589	-0.086	0.76746	-0.11604	0.02933	-0.14915	-0.04453	0.18027	0.24275	0.0497	0.15061	0.81777	0.02172	-0.05018	-0.15155	-0.06867	0.19025	0.13153
	0.7259	0.9939	<.0001	0.8762	0.9001	0.5372	0.9346	0.3451	0.4544	0.7375	0.7316		0.9467	0.5929	0.4278	0.9842	0.391	0.7027	0.8709	0.9645	0.0004	0.8787	0.8981	0.6416	0.9032	0.2476	0.4135	0.4336	0.7035	<.0001	0.6071	0.8969	0.5077	0.844	0.4221	0.2764	0.8261	0.5035	<.0001	0.9236	0.8245	0.5008	0.7614	0.3964	0.5596
DM_C	0.07288	0.51842	0.07136	0.96721	-0.27628	0.53243	0.72789	-0.10556	0.03618	0.01004	0.3688	-0.01512	1	-0.30177	0.48722	0.71634	-0.06175	-0.04501	0.01277	0.64178	0.0619	0.90398	-0.31307	0.50747	0.56951	-0.05679	0.0597	0.1445	0.30745	-0.03216	0.92487	-0.214	0.52417	0.63741	-0.19315	0.10416	0.18198	0.55545	0.22014	0.91912	-0.20866	0.56675	0.71362	-0.11622	0.03482
	0.7472	0.0134	0.7523	<.0001	0.2133	0.0107	0.0001	0.6401	0.873	0.9646	0.0912	0.9467		0.1723	0.0215	0.0002	0.7849	0.8424	0.955	0.0013	0.7844	<.0001	0.156	0.0159	0.0057	0.8018	0.7919	0.5211	0.164	0.887	<.0001	0.3389	0.0123	0.0014	0.3891	0.6446	0.4176	0.0073	0.3249	<.0001	0.3514	0.006	0.0002	0.6065	0.8777
HR_C	0.47232	-0.51	0.0507	-0.3473	0.93091	-0.12433	-0.42918	0.20426	0.27356	0.40286	-0.36477	0.1206	-0.30177	1	-0.16071	-0.25723	0.21004	0.18409	0.4645	-0.29319	-0.16794	-0.3417	0.83775	-0.09773	-0.25444	0.22996	0.28659	0.50301	-0.62875	0.20321	-0.34047	0.84492	-0.11768	-0.56584	0.15996	0.32729	0.48133	-0.60251	0.01591	-0.35294	0.77655	-0.12065	-0.48782	0.18987	0.23378
	0.0264	0.0153	0.8227	0.1133	<.0001	0.5814	0.0462	0.3619	0.218	0.063	0.0951	0.5929	0.1723		0.4749	0.2478	0.3481	0.4122	0.0294	0.1854	0.455	0.1196	<.0001	0.6653	0.2532	0.3032	0.196	0.017	0.0017	0.3644	0.121	<.0001	0.602	0.0061	0.477	0.1371	0.0233	0.003	0.944	0.1071	<.0001	0.5928	0.0213	0.3974	0.295
DF_C	0.12694	0.26311	-0.07813	0.48767	-0.08324	0.96526	0.71213	0.20867	-0.08803	0.06901	0.26587	-0.17812	0.48722	-0.16071	1	0.6734	0.18499	0.00778	0.06396	0.47435	-0.01638	0.47398	-0.07488	0.91402	0.70137	0.17286	-0.06523	0.17661	0.04661	-0.17167	0.44122	-0.05225	0.94189	0.62144	0.21149	-0.08105	0.24269	0.15582	0.08298	0.49191	-0.03899	0.90461	0.59531	0.25866	-0.23562
	0.5735	0.2368	0.7296	0.0213	0.7127	<.0001	0.0002	0.3514	0.6969	0.7603	0.2317	0.4278	0.0215	0.4749		0.0006	0.4098	0.9726	0.7774	0.0257	0.9423	0.0258	0.7405	<.0001	0.0003	0.4417	0.773	0.4317	0.8368	0.4449	0.0398	0.8174	<.0001	0.002	0.3447	0.7199	0.2765	0.4886	0.7135	0.0201	0.8632	<.0001	0.0035	0.2451	0.2912
PH_C	0.23735	0.50234	0.12369	0.67839	-0.21746	0.73957	0.9332	0.04573	0.11611	0.21914	0.47409	0.00447	0.71634	-0.25723	0.6734	1	0.07675	0.17566	0.16735	0.61591	0.10883	0.61935	-0.23598	0.78689	0.73317	0.07964	0.11464	0.25472	0.2861	0.02405	0.67139	-0.19036	0.66628	0.76323	-0.01993	0.13905	0.31027	0.45091	0.29014	0.62553	-0.14108	0.73068	0.86844	0.03089	-0.02061
	0.2875	0.0172	0.5834	0.0005	0.331	<.0001	<.0001	0.8399	0.6069	0.3272	0.0258	0.9842	0.0002	0.2478	0.0006		0.7342	0.4342	0.4566	0.0023	0.6297	0.0021	0.2904	<.0001	0.0001	0.7246	0.6115	0.2526	0.1968	0.9154	0.0006	0.3961	0.0007	<.0001	0.9299	0.5371	0.1599	0.0352	0.1903	0.0018	0.5311	0.0001	<.0001	0.8914	0.9275
SW_C	0.65159	0.38541	0.25524	-0.0242	0.19918	0.15959	0.09837	0.98033	0.17065	0.64151	0.44412	0.19238	-0.06175	0.21004	0.18499	0.07675	1	0.30806	0.60036	0.43958	0.00714	0.00139	0.4339	0.1813	0.19238	0.94752	0.30358	0.70922	0.35047	0.33891	0.01344	0.02928	0.15501	-0.01421	0.95349	0.00886	0.57775	0.19107	0.3476	-0.03174	0.1044	0.07164	0.10693	0.93425	-0.14953
	0.001	0.0765	0.2516	0.9149	0.3742	0.4781	0.6632	<.0001	0.4477	0.0013	0.0384	0.391	0.7849	0.3481	0.4098	0.7342		0.1631	0.0031	0.0407	0.9748	0.9951	0.0436	0.4194	0.391	<.0001	0.1696	0.0002	0.1098	0.1229	0.9527	0.8971	0.4909	0.9499	<.0001	0.9688	0.0049	0.3943	0.1129	0.8885	0.6438	0.7514	0.6358	<.0001	0.5066
SPAD_C	0.69063	0.43852	0.03833	-0.01317	0.00179	0.03196	0.05642	0.30742	0.94065	0.74859	0.61809	0.08627	-0.04501	0.18409	0.00778	0.17566	0.30806	1	0.67407	0.43836	-0.09385	-0.00974	0.13022	0.10602	0.06143	0.39476	0.89653	0.55805	0.24323	0.01074	0.04391	-0.14536	0.01432	-0.14126	0.26677	0.79486	0.61709	0.32027	0.12331	-0.02725	-0.10101	-0.04282	0.09689	0.21168	0.76461
	0.0004	0.0412	0.8655	0.9536	0.9937	0.8877	0.8031	0.164	<.0001	<.0001	0.0022	0.7027	0.8424	0.4122	0.9726	0.4342	0.1631		0.0006	0.0413	0.6778	0.9657	0.5635	0.6387	0.7859	0.069	<.0001	0.007	0.2754	0.9622	0.8462	0.5187	0.9496	0.5306	0.2301	<.0001	0.0022	0.1462	0.5846	0.9042	0.6547	0.8499	0.668	0.3443	<.0001
Ndfa_R	0.97781	0.35315	-0.01484	0.01162	0.34951	0.0959	0.06635	0.57018	0.65828	0.95375	0.52097	0.03678	0.01277	0.4645	0.06396	0.16735	0.60036	0.67407	1	0.44617	-0.36608	-0.00646	0.44425	0.19035	0.04449	0.62823	0.74471	0.84947	0.14931	0.07739	0.07277	0.21293	0.06406	-0.1166	0.51503	0.544	0.92013	0.18257	0.14972	-0.00904	0.21568	0.00704	0.1334	0.46666	0.38203
	<.0001	0.1069	0.9478	0.9591	0.1108	0.6712	0.7693	0.0056	0.0009	<.0001	0.0129	0.8709	0.955	0.0294	0.7774	0.4566	0.0031	0.0006		0.0374	0.0938	0.9772	0.0383	0.3962	0.8441	0.0017	<.0001	<.0001	0.5072	0.7321	0.7476	0.3414	0.777	0.6053	0.0142	0.0089	<.0001	0.4161	0.506	0.9681	0.3351	0.9752	0.554	0.0286	0.0793
YD_R	0.51247	0.92428	0.05304	0.66428	-0.38477	0.47983	0.60892	0.39907	0.38834	0.52163	0.86112	-0.01009	0.64178	-0.29319	0.47435	0.61591	0.43958	0.43836	0.44617	1	-0.01299	0.63203	-0.22806	0.46643	0.49264	0.44958	0.43246	0.47002	0.72468	-0.06637	0.66614	-0.49891	0.49093	0.42415	0.31419	0.26228	0.54016	0.79998	0.25555	0.64341	-0.3644	0.42763	0.67247	0.34195	0.23842
	0.0147	<.0001	0.8146	0.0007	0.077	0.0238	0.0026	0.0658	0.0741	0.0128	<.0001	0.9645	0.0013	0.1854	0.0257	0.0023	0.0407	0.0413	0.0374		0.9543	0.0016	0.3073	0.0287	0.0198	0.0358	0.0444	0.0273	0.0001	0.7692	0.0007	0.0181	0.0203	0.0491	0.1544	0.2383	0.0095	<.0001	0.251	0.0012	0.0955	0.0471	0.0006	0.1193	0.2853
Cdisc_R	-0.29855	-0.01181	0.85831	0.06442	-0.16737	-0.03889	0.08153	0.0363	-0.13019	-0.3056	-0.15948	0.68395	0.0619	-0.16794	-0.01638	0.10883	0.00714	-0.09385	-0.36608	-0.01299	1	0.01913	-0.17157	-0.04341	0.11206	0.04451	-0.22224	-0.15862	-0.00498	0.65176	0.01092	-0.12892	-0.06298	0.04722	0.01165	-0.03866	-0.25646	0.11854	0.77635	0.1359	-0.15324	-0.05031	0.00713	0.08539	-0.06719
	0.1771	0.9584	<.0001	0.7758	0.4566	0.8636	0.7183	0.8726	0.5636	0.1666	0.4784	0.0004	0.7844	0.455	0.9423	0.6297	0.9748	0.6778	0.0938	0.9543		0.9327	0.4452	0.8479	0.6195	0.8441	0.3202	0.4808	0.9825	0.001	0.9615	0.5675	0.7807	0.8347	0.959	0.8644	0.2493	0.5993	<.0001	0.5465	0.496	0.8241	0.9749	0.7056	0.7664
DM_R	0.05289	0.5605	0.0528	0.96564	-0.34128	0.50235	0.68485	-0.05732	0.03105	-0.01478	0.43207	-0.03453	0.90398	-0.3417	0.47398	0.61935	0.00139	-0.00974	-0.00646	0.63203	0.01913	1	-0.38409	0.46124	0.59028	-0.0204	0.07738	0.13603	0.37201	-0.0153	0.89765	-0.3001	0.49872	0.65149	-0.14797	0.01847	0.16185	0.59939	0.20019	0.94444	-0.24693	0.54337	0.62816	-0.07239	0.01365
	0.8152	0.0067	0.8155	<.0001	0.1201	0.0172	0.0004	0.8	0.8909	0.948	0.0446	0.8787	<.0001	0.1196	0.0258	0.0021	0.9951	0.9657	0.9772	0.0016	0.9327		0.0776	0.0307	0.0038	0.9282	0.7322	0.5461	0.0882	0.9461	<.0001	0.1748	0.0181	0.001	0.5111	0.935	0.4718	0.0032	0.3717	<.0001	0.2679	0.009	0.0017	0.7489	0.9519
HR_R	0.44835	-0.42997	-0.00607	-0.38739	0.87111	-0.03791	-0.34089	0.44259	0.11374	0.40439	-0.30108	0.02898	-0.31307	0.83775	-0.07488	-0.23598	0.4339	0.13022	0.44425	-0.22806	-0.17157	-0.38409	1	-0.03541	-0.14429	0.40587	0.15364	0.49382	-0.49516	0.14955	-0.3563	0.76622	0.00118	-0.43702	0.45428	0.0953	0.40446	-0.56483	-0.03634	-0.42984	0.63996	-0.05437	-0.41909	0.44082	0.00026
	0.0364	0.0458	0.9786	0.0749	<.0001	0.867	0.1205	0.0391	0.6143	0.0619	0.1733	0.8981	0.156	<.0001	0.7405	0.2904	0.0436	0.5635	0.0383	0.3073	0.4452	0.0776		0.8757	0.5217	0.0609	0.4948	0.0195	0.0191	0.5065	0.1036	<.0001	0.9958	0.042	0.0337	0.6731	0.0619	0.0062	0.8725	0.0459	0.0013	0.8101	0.0522	0.04	0.9991
DF_R	0.23075	0.26753	-0.03964	0.48622	-0.00643	0.97198	0.80305	0.21082	0.03132	0.1939	0.31155	-0.1051	0.50747	-0.09773	0.91402	0.78689	0.1813	0.10602	0.19035	0.46643	-0.04341	0.46124	-0.03541	1	0.77083	0.20717	0.06975	0.20166	0.03376	-0.11664	0.45453	0.02408	0.90398	0.63398	0.20064	0.05873	0.33053	0.15037	0.11261	0.46747	0.05594	0.951	0.726	0.24022	-0.17206
	0.3015	0.2287	0.861	0.0218	0.9774	<.0001	<.0001	0.3463	0.89	0.3873	0.1581	0.6416	0.0159	0.6653	<.0001	<.0001	0.4194	0.6387	0.3962	0.0287	0.8479	0.0307	0.8757		<.0001	0.3549	0.7578	0.3681	0.8814	0.6052	0.0336	0.9153	<.0001	0.0015	0.3706	0.7952	0.133	0.5042	0.6178	0.0283	0.8047	<.0001	0.0001	0.2816	0.4439
PH_R	0.06546	0.36206	0.12197	0.54465	-0.1075	0.75035	0.87038	0.15035	-0.03392	0.03378	0.33261	0.02754	0.56951	-0.25444	0.70137	0.73317	0.19238	0.06143	0.04449	0.49264	0.11206	0.59028	-0.14429	0.77083	1	0.11296	-0.04183	0.09513	0.22451	0.03163	0.46596	-0.08568	0.69969	0.7292	0.14082	0.03306	0.1075	0.26623	0.26438	0.49779	0.04328	0.74324	0.71896	0.1412	-0.20415
	0.7722	0.0978	0.5887	0.0088	0.6339	<.0001	<.0001	0.5042	0.8809	0.8814	0.1304	0.9032	0.0057	0.2532	0.0003	0.0001	0.391	0.7859	0.8441	0.0198	0.6195	0.0038	0.5217	<.0001		0.6167	0.8534	0.6737	0.3151	0.8889	0.0288	0.7046	0.0003	0.0001	0.5319	0.8839	0.6339	0.2311	0.2345	0.0184	0.8483	<.0001	0.0002	0.5308	0.3621
SW_R	0.6919	0.39477	0.27896	-0.029	0.16484	0.17515	0.06141	0.97789	0.29312	0.69803	0.45766	0.25732	-0.05679	0.22996	0.17286	0.07964	0.94752	0.39476	0.62823	0.44958	0.04451	-0.0204	0.40587	0.20717	0.11296	1	0.43871	0.7086	0.31653	0.31857	-0.00479	-0.01158	0.16691	-0.08893	0.93532	0.12552	0.63925	0.23197	0.35781	-0.0226	0.03717	0.09948	0.12066	0.94014	-0.03311
	0.0004	0.069	0.2087	0.898	0.4635	0.4356	0.786	<.0001	0.1855	0.0003	0.0322	0.2476	0.8018	0.3032	0.4417	0.7246	<.0001	0.069	0.0017	0.0358	0.8441	0.9282	0.0609	0.3549	0.6167		0.0411	0.0002	0.1512	0.1485	0.9831	0.9592	0.4578	0.6939	<.0001	0.5778	0.0014	0.2989	0.1021	0.9205	0.8696	0.6596	0.5928	<.0001	0.8837
SPAD_R	0.76224	0.42588	0.02282	0.07201	0.05279	0.00063	-0.00103	0.3145	0.96472	0.80276	0.5809	0.18355	0.0597	0.28659	-0.06523	0.11464	0.30358	0.89653	0.74471	0.43246	-0.22224	0.07738	0.15364	0.06975	-0.04183	0.43871	1	0.63816	0.18615	0.0036	0.09584	-0.09288	0.00013	-0.18635	0.24742	0.83897	0.69699	0.36622	0.09632	0.05709	-0.08136	-0.04025	0.10175	0.2139	0.80393
	<.0001	0.0481	0.9197	0.7501	0.8155	0.9978	0.9964	0.154	<.0001	<.0001	0.0046	0.4135	0.7919	0.196	0.773	0.6115	0.1696	<.0001	<.0001	0.0444	0.3202	0.7322	0.4948	0.7578	0.8534	0.0411		0.0014	0.4069	0.9873	0.6714	0.681	0.9995	0.4063	0.2669	<.0001	0.0003	0.0937	0.6698	0.8008	0.7189	0.8588	0.6523	0.3391	<.0001
Ndfa_N	0.91897	0.32916	0.18344	0.14464	0.38812	0.18134	0.11381	0.6581	0.54466	0.8654	0.44345	0.17589	0.1445	0.50301	0.17661	0.25472	0.70922	0.55805	0.84947	0.47002	-0.15862	0.13603	0.49382	0.20166	0.09513	0.7086	0.63816	1	0.12672	0.29799	0.20284	0.2565	0.19213	-0.04953	0.56568	0.41486	0.87107	0.16274	0.30256	0.1022	0.23051	0.09943	0.09425	0.56975	0.31256
	<.0001	0.1347	0.4138	0.5207	0.0743	0.4193	0.614	0.0009	0.0088	<.0001	0.0387	0.4336	0.5211	0.017	0.4317	0.2526	0.0002	0.007	<.0001	0.0273	0.4808	0.5461	0.0195	0.3681	0.6737	0.0002	0.0014		0.5742	0.178	0.3653	0.2492	0.3917	0.8268	0.0061	0.0549	<.0001	0.4693	0.1711	0.6509	0.3021	0.6598	0.6765	0.0056	0.1567
YD_N	0.16265	0.89065	0.00079	0.37246	-0.71011	0.03387	0.37318	0.29777	0.14276	0.22747	0.7939	-0.086	0.30745	-0.62875	0.04661	0.2861	0.35047	0.24323	0.14931	0.72468	-0.00498	0.37201	-0.49516	0.03376	0.22451	0.31653	0.18615	0.12672	1	0.00202	0.40582	-0.79856	0.04371	0.36527	0.25199	-0.07534	0.08383	0.77994	0.07185	0.36274	-0.66122	0.00738	0.4795	0.23435	0.09085
	0.4696	<.0001	0.9972	0.0878	0.0002	0.8811	0.0872	0.1783	0.5262	0.3086	<.0001	0.7035	0.164	0.0017	0.8368	0.1968	0.1098	0.2754	0.5072	0.0001	0.9825	0.0882	0.0191	0.8814	0.3151	0.1512	0.4069	0.5742		0.9929	0.0609	<.0001	0.8468	0.0946	0.2579	0.739	0.7107	<.0001	0.7507	0.0971	0.0008	0.974	0.0239	0.2938	0.6876
Cdisc_N	0.11063	-0.06721	0.88819	0.0052	0.15687	-0.16429	-0.00756	0.30662	-0.01003	0.07066	-0.13423	0.76746	-0.03216	0.20321	-0.17167	0.02405	0.33891	0.01074	0.07739	-0.06637	0.65176	-0.0153	0.14955	-0.11664	0.03163	0.31857	0.0036	0.29799	0.00202	1	0.01257	0.18166	-0.20771	0.03029	0.25185	-0.02596	0.04057	-0.04992	0.75422	0.0539	0.06394	-0.18049	-0.13727	0.28118	-0.04198
	0.624	0.7663	<.0001	0.9817	0.4857	0.465	0.9734	0.1652	0.9647	0.7547	0.5515	<.0001	0.887	0.3644	0.4449	0.9154	0.1229	0.9622	0.7321	0.7692	0.001	0.9461	0.5065	0.6052	0.8889	0.1485	0.9873	0.178	0.9929		0.9557	0.4185	0.3536	0.8935	0.2582	0.9087	0.8577	0.8254	<.0001	0.8117	0.7774	0.4215	0.5424	0.2049	0.8529
DM_N	0.1382	0.57892	0.02955	0.96446	-0.32402	0.46797	0.66417	-0.04709	0.06201	0.0933	0.46207	-0.11604	0.92487	-0.34047	0.44122	0.67139	0.01344	0.04391	0.07277	0.66614	0.01092	0.89765	-0.3563	0.45453	0.46596	-0.00479	0.09584	0.20284	0.40582	0.01257	1	-0.26928	0.4455	0.60059	-0.1434	0.0428	0.22191	0.57182	0.16743	0.91847	-0.24366	0.49529	0.65951	-0.06598	0.03073
	0.5396	0.0048	0.8961	<.0001	0.1413	0.0281	0.0007	0.8351	0.784	0.6796	0.0304	0.6071	<.0001	0.121	0.0398	0.0006	0.9527	0.8462	0.7476	0.0007	0.9615	<.0001	0.1036	0.0336	0.0288	0.9831	0.6714	0.3653	0.0609	0.9557		0.2256	0.0377	0.0031	0.5244	0.85	0.3209	0.0054	0.4564	<.0001	0.2745	0.0191	0.0008	0.7705	0.892
HR_N	0.19406	-0.73323	0.02057	-0.29021	0.96078	-0.00882	-0.29534	0.01586	-0.0856	0.09339	-0.60935	0.02933	-0.214	0.84492	-0.05225	-0.19036	0.02928	-0.14536	0.21293	-0.49891	-0.12892	-0.3001	0.76622	0.02408	-0.08568	-0.01158	-0.09288	0.2565	-0.79856	0.18166	-0.26928	1	-0.02663	-0.38387	0.01533	0.07585	0.23432	-0.80479	-0.01724	-0.32722	0.89882	0.01634	-0.41318	0.0297	-0.11749
	0.3868	0.0001	0.9276	0.1901	<.0001	0.9689	0.1821	0.9441	0.7049	0.6793	0.0026	0.8969	0.3389	<.0001	0.8174	0.3961	0.8971	0.5187	0.3414	0.0181	0.5675	0.1748	<.0001	0.9153	0.7046	0.9592	0.681	0.2492	<.0001	0.4185	0.2256		0.9064	0.0778	0.946	0.7372	0.2939	<.0001	0.9393	0.1372	<.0001	0.9425	0.056	0.8956	0.6026
DF_N	0.13427	0.25777	-0.12046	0.494	-0.04305	0.97534	0.69092	0.181	-0.04013	0.09377	0.23905	-0.14915	0.52417	-0.11768	0.94189	0.66628	0.15501	0.01432	0.06406	0.49093	-0.06298	0.49872	0.00118	0.90398	0.69969	0.16691	0.00013	0.19213	0.04371	-0.20771	0.4455	-0.02663	1	0.58566	0.17995	-0.05371	0.22528	0.14635	-0.00824	0.45645	-0.03065	0.95474	0.56432	0.2127	-0.15666
	0.5513	0.2468	0.5934	0.0195	0.8491	<.0001	0.0004	0.4202	0.8593	0.6781	0.284	0.5077	0.0123	0.602	<.0001	0.0007	0.4909	0.9496	0.777	0.0203	0.7807	0.0181	0.9958	<.0001	0.0003	0.4578	0.9995	0.3917	0.8468	0.3536	0.0377	0.9064		0.0042	0.4229	0.8124	0.3134	0.5158	0.971	0.0327	0.8923	<.0001	0.0062	0.3419	0.4863
PH_N	-0.10843	0.43164	0.06316	0.64892	-0.47669	0.63323	0.89906	-0.0585	-0.21272	-0.12492	0.32422	-0.04453	0.63741	-0.56584	0.62144	0.76323	-0.01421	-0.14126	-0.1166	0.42415	0.04722	0.65149	-0.43702	0.63398	0.7292	-0.08893	-0.18635	-0.04953	0.36527	0.03029	0.60059	-0.38387	0.58566	1	-0.04997	-0.21661	-0.10315	0.46336	0.17529	0.62911	-0.39755	0.61185	0.76742	-0.07772	-0.28127
	0.631	0.0449	0.7801	0.0011	0.0249	0.0016	<.0001	0.7959	0.3419	0.5797	0.141	0.844	0.0014	0.0061	0.002	<.0001	0.9499	0.5306	0.6053	0.0491	0.8347	0.001	0.042	0.0015	0.0001	0.6939	0.4063	0.8268	0.0946	0.8935	0.0031	0.0778	0.0042		0.8252	0.3329	0.6478	0.0299	0.4352	0.0017	0.0669	0.0025	<.0001	0.731	0.2048
SW_N	0.54806	0.2741	0.20599	-0.16984	0.17181	0.18166	0.03006	0.98132	0.11287	0.55686	0.34467	0.18027	-0.19315	0.15996	0.21149	-0.01993	0.95349	0.26677	0.51503	0.31419	0.01165	-0.14797	0.45428	0.20064	0.14082	0.93532	0.24742	0.56568	0.25199	0.25185	-0.1434	0.01533	0.17995	-0.04997	1	-0.04126	0.47143	0.10612	0.27577	-0.16281	0.0471	0.08385	0.04885	0.96014	-0.22197
	0.0083	0.217	0.3577	0.4499	0.4445	0.4185	0.8944	<.0001	0.617	0.0071	0.1162	0.4221	0.3891	0.477	0.3447	0.9299	<.0001	0.2301	0.0142	0.1544	0.959	0.5111	0.0337	0.3706	0.5319	<.0001	0.2669	0.0061	0.2579	0.2582	0.5244	0.946	0.4229	0.8252		0.8553	0.0268	0.6383	0.2142	0.4691	0.8351	0.7106	0.8291	<.0001	0.3208
SPAD_N	0.54795	0.20318	0.10863	0.05174	0.16326	-0.02714	0.01349	0.00669	0.91568	0.56857	0.33707	0.24275	0.10416	0.32729	-0.08105	0.13905	0.00886	0.79486	0.544	0.26228	-0.03866	0.01847	0.0953	0.05873	0.03306	0.12552	0.83897	0.41486	-0.07534	-0.02596	0.0428	0.07585	-0.05371	-0.21661	-0.04126	1	0.53897	0.21048	0.20338	0.03672	0.13553	-0.06693	0.08314	-0.0934	0.83396
	0.0083	0.3645	0.6304	0.8191	0.4679	0.9046	0.9525	0.9764	<.0001	0.0058	0.125	0.2764	0.6446	0.1371	0.7199	0.5371	0.9688	<.0001	0.0089	0.2383	0.8644	0.935	0.6731	0.7952	0.8839	0.5778	<.0001	0.0549	0.739	0.9087	0.85	0.7372	0.8124	0.3329	0.8553		0.0096	0.3471	0.364	0.8711	0.5476	0.7673	0.713	0.6793	<.0001
Ndfa_RN	0.95836	0.38271	0.03427	0.18731	0.36634	0.26283	0.15549	0.56383	0.61554	0.90628	0.53723	0.0497	0.18198	0.48133	0.24269	0.31027	0.57775	0.61709	0.92013	0.54016	-0.25646	0.16185	0.40446	0.33053	0.1075	0.63925	0.69699	0.87107	0.08383	0.04057	0.22191	0.23432	0.22528	-0.10315	0.47143	0.53897	1	0.23342	0.24719	0.17871	0.26886	0.18868	0.23365	0.49854	0.34688
	<.0001	0.0788	0.8796	0.4039	0.0936	0.2373	0.4896	0.0063	0.0023	<.0001	0.0099	0.8261	0.4176	0.0233	0.2765	0.1599	0.0049	0.0022	<.0001	0.0095	0.2493	0.4718	0.0619	0.133	0.6339	0.0014	0.0003	<.0001	0.7107	0.8577	0.3209	0.2939	0.3134	0.6478	0.0268	0.0096		0.2958	0.2674	0.4262	0.2263	0.4004	0.2953	0.0182	0.1137
YD_RN	0.22661	0.92501	0.15596	0.6091	-0.73448	0.14924	0.50223	0.1684	0.32226	0.27295	0.8165	0.15061	0.55545	-0.60251	0.15582	0.45091	0.19107	0.32027	0.18257	0.79998	0.11854	0.59939	-0.56483	0.15037	0.26623	0.23197	0.36622	0.16274	0.77994	-0.04992	0.57182	-0.80479	0.14635	0.46336	0.10612	0.21048	0.23342	1	0.32301	0.62959	-0.69918	0.11469	0.63478	0.11544	0.25323
	0.3105	<.0001	0.4882	0.0026	<.0001	0.5074	0.0172	0.4538	0.1436	0.2191	<.0001	0.5035	0.0073	0.003	0.4886	0.0352	0.3943	0.1462	0.4161	<.0001	0.5993	0.0032	0.0062	0.5042	0.2311	0.2989	0.0937	0.4693	<.0001	0.8254	0.0054	<.0001	0.5158	0.0299	0.6383	0.3471	0.2958		0.1426	0.0017	0.0003	0.6113	0.0015	0.609	0.2555
Cdisc_RN	0.20622	0.22088	0.93542	0.23264	-0.01731	0.05909	0.26561	0.33363	0.11056	0.15583	0.14061	0.81777	0.22014	0.01591	0.08298	0.29014	0.3476	0.12331	0.14972	0.25555	0.77635	0.20019	-0.03634	0.11261	0.26438	0.35781	0.09632	0.30256	0.07185	0.75422	0.16743	-0.01724	-0.00824	0.17529	0.27577	0.20338	0.24719	0.32301	1	0.30582	-0.02112	-0.00315	0.21162	0.31877	-0.00548
	0.3572	0.3233	<.0001	0.2975	0.9391	0.7939	0.2322	0.1292	0.6243	0.4886	0.5325	<.0001	0.3249	0.944	0.7135	0.1903	0.1129	0.5846	0.506	0.251	<.0001	0.3717	0.8725	0.6178	0.2345	0.1021	0.6698	0.1711	0.7507	<.0001	0.4564	0.9393	0.971	0.4352	0.2142	0.364	0.2674	0.1426		0.1663	0.9257	0.9889	0.3444	0.1482	0.9807
DM_RN	0.04596	0.56867	0.15107	0.9775	-0.38426	0.49109	0.66631	-0.0674	0.02524	-0.02548	0.42653	0.02172	0.91912	-0.35294	0.49191	0.62553	-0.03174	-0.02725	-0.00904	0.64341	0.1359	0.94444	-0.42984	0.46747	0.49779	-0.0226	0.05709	0.1022	0.36274	0.0539	0.91847	-0.32722	0.45645	0.62911	-0.16281	0.03672	0.17871	0.62959	0.30582	1	-0.31323	0.51112	0.66062	-0.05819	0.02821
	0.8391	0.0058	0.5022	<.0001	0.0775	0.0203	0.0007	0.7657	0.9112	0.9104	0.0478	0.9236	<.0001	0.1071	0.0201	0.0018	0.8885	0.9042	0.9681	0.0012	0.5465	<.0001	0.0459	0.0283	0.0184	0.9205	0.8008	0.6509	0.0971	0.8117	<.0001	0.1372	0.0327	0.0017	0.4691	0.8711	0.4262	0.0017	0.1663		0.1558	0.0151	0.0008	0.797	0.9008
HR_RN	0.21178	-0.59177	-0.0432	-0.26421	0.91315	0.00581	-0.22127	0.06372	-0.06139	0.13663	-0.46369	-0.05018	-0.20866	0.77655	-0.03899	-0.14108	0.1044	-0.10101	0.21568	-0.3644	-0.15324	-0.24693	0.63996	0.05594	0.04328	0.03717	-0.08136	0.23051	-0.66122	0.06394	-0.24366	0.89882	-0.03065	-0.39755	0.0471	0.13553	0.26886	-0.69918	-0.02112	-0.31323	1	0.03846	-0.30162	0.05763	-0.14141
	0.3441	0.0037	0.8486	0.2348	<.0001	0.9795	0.3224	0.7782	0.7861	0.5443	0.0297	0.8245	0.3514	<.0001	0.8632	0.5311	0.6438	0.6547	0.3351	0.0955	0.496	0.2679	0.0013	0.8047	0.8483	0.8696	0.7189	0.3021	0.0008	0.7774	0.2745	<.0001	0.8923	0.0669	0.8351	0.5476	0.2263	0.0003	0.9257	0.1558		0.8651	0.1725	0.7989	0.5302
DF_RN	0.07175	0.21479	-0.10783	0.54448	-0.02409	0.97748	0.75427	0.10272	-0.08318	0.03322	0.21493	-0.15155	0.56675	-0.12065	0.90461	0.73068	0.07164	-0.04282	0.00704	0.42763	-0.05031	0.54337	-0.05437	0.951	0.74324	0.09948	-0.04025	0.09943	0.00738	-0.18049	0.49529	0.01634	0.95474	0.61185	0.08385	-0.06693	0.18868	0.11469	-0.00315	0.51112	0.03846	1	0.66089	0.15227	-0.19835
	0.751	0.3371	0.6329	0.0088	0.9153	<.0001	<.0001	0.6492	0.7129	0.8833	0.3368	0.5008	0.006	0.5928	<.0001	0.0001	0.7514	0.8499	0.9752	0.0471	0.8241	0.009	0.8101	<.0001	<.0001	0.6596	0.8588	0.6598	0.974	0.4215	0.0191	0.9425	<.0001	0.0025	0.7106	0.7673	0.4004	0.6113	0.9889	0.0151	0.8651		0.0008	0.4987	0.3762
PH_RN	0.16728	0.6599	0.00959	0.6869	-0.43291	0.65839	0.92441	0.0972	0.06256	0.17754	0.62971	-0.06867	0.71362	-0.48782	0.59531	0.86844	0.10693	0.09689	0.1334	0.67247	0.00713	0.62816	-0.41909	0.726	0.71896	0.12066	0.10175	0.09425	0.4795	-0.13727	0.65951	-0.41318	0.56432	0.76742	0.04885	0.08314	0.23365	0.63478	0.21162	0.66062	-0.30162	0.66089	1	0.09868	-0.08939
	0.4568	0.0008	0.9662	0.0004	0.0442	0.0009	<.0001	0.667	0.7821	0.4293	0.0017	0.7614	0.0002	0.0213	0.0035	<.0001	0.6358	0.668	0.554	0.0006	0.9749	0.0017	0.0522	0.0001	0.0002	0.5928	0.6523	0.6765	0.0239	0.5424	0.0008	0.056	0.0062	<.0001	0.8291	0.713	0.2953	0.0015	0.3444	0.0008	0.1725	0.0008		0.6622	0.6924
SW_RN	0.52737	0.28108	0.24851	-0.08236	0.18271	0.22751	0.05019	0.97701	0.06885	0.51999	0.34721	0.19025	-0.11622	0.18987	0.25866	0.03089	0.93425	0.21168	0.46666	0.34195	0.08539	-0.07239	0.44082	0.24022	0.1412	0.94014	0.2139	0.56975	0.23435	0.28118	-0.06598	0.0297	0.2127	-0.07772	0.96014	-0.0934	0.49854	0.11544	0.31877	-0.05819	0.05763	0.15227	0.09868	1	-0.24516
	0.0117	0.2051	0.2648	0.7156	0.4157	0.3086	0.8245	<.0001	0.7608	0.0131	0.1134	0.3964	0.6065	0.3974	0.2451	0.8914	<.0001	0.3443	0.0286	0.1193	0.7056	0.7489	0.04	0.2816	0.5308	<.0001	0.3391	0.0056	0.2938	0.2049	0.7705	0.8956	0.3419	0.731	<.0001	0.6793	0.0182	0.609	0.1482	0.797	0.7989	0.4987	0.6622		0.2715
SPAD_RN	0.3931	0.25495	0.00482	0.02683	-0.02488	-0.19122	-0.16019	-0.15884	0.89576	0.43286	0.35406	0.13153	0.03482	0.23378	-0.23562	-0.02061	-0.14953	0.76461	0.38203	0.23842	-0.06719	0.01365	0.00026	-0.17206	-0.20415	-0.03311	0.80393	0.31256	0.09085	-0.04198	0.03073	-0.11749	-0.15666	-0.28127	-0.22197	0.83396	0.34688	0.25323	-0.00548	0.02821	-0.14141	-0.19835	-0.08939	-0.24516	1
	0.0703	0.2522	0.983	0.9057	0.9125	0.394	0.4764	0.4802	<.0001	0.0442	0.106	0.5596	0.8777	0.295	0.2912	0.9275	0.5066	<.0001	0.0793	0.2853	0.7664	0.9519	0.9991	0.4439	0.3621	0.8837	<.0001	0.1567	0.6876	0.8529	0.892	0.6026	0.4863	0.2048	0.3208	<.0001	0.1137	0.2555	0.9807	0.9008	0.5302	0.3762	0.6924	0.2715
